# Supplementary material for: Highly selective and effective mercury(ii) fluorescent sensors
Source: Royal Society of Chemistry journal article supplement (doi:10.1039/c4nj01147c), 2014-08-29
Supplement: c4nj01147c1.pdf [file c4nj01147c1.pdf]

*Electronic Supplementary Material*

**Highly selective and effective mercury (II) fluorescent sensor**

**JingHan Hu, JianBin Li, Jing Qi, JuanJuan Chen**

*College of Chemical and Biological Engineering, Lanzhou Jiaotong University, Lanzhou,*

*Gansu, 730070, P. R. China*

**Fig. S1** UV-vis spectra of **L** and in the presence of 10 equiv. of  $\text{Hg}^{2+}$  in  $\text{H}_2\text{O}/\text{DMSO}$  (1:9, v/v) binary solution at room temperature.

**Fig. S2**  $^1\text{H}$ -NMR spectrum of **L** in DMSO.

**Fig. S3** ESI-MS spectrum of **L** in DMSO.

**Fig. S4** ESI-MS spectrum in the presence of  $\text{Hg}^{2+}$  in DMSO.
